# Supplementary material for: Mapping and characterising electronic palliative care coordination systems and their intended impact: A national survey of end-of-life care commissioners
Source: PubMed Central journal article supplement (PMC9565729; doi:10.1371/journal.pone.0275991), 2022-10-14
Supplement: pone.0275991.s003.pdf [file pone.0275991.s003.pdf]

**Electronic patient record system providers involved in storage and sharing of data captured in EPaCCS**

| System                                      | CCGs with Operational EPaCCS |              | CCGs planning an EPaCCS |              |
|---------------------------------------------|------------------------------|--------------|-------------------------|--------------|
|                                             | Lead system                  | Other system | Lead system             | Other system |
| SystemOne                                   | 28                           | 16           | 3                       | 5            |
| EMIS                                        | 27                           | 17           | 4                       | 7            |
| Co-ordinate My Care                         | 18                           |              | 3                       |              |
| Black Pear                                  | 7                            | 2            |                         | 1            |
| Cerner                                      | 6                            | 3            |                         |              |
| Adastra                                     | 5                            | 21           | 2                       | 6            |
| MIG                                         | 3                            | 8            | 2                       | 1            |
| Graphnet                                    | 2                            | 2            | 5                       |              |
| Vision                                      | 1                            | 1            |                         | 3            |
| Bespoke local system                        |                              | 11           |                         | 4            |
| SCR                                         |                              | 8            |                         | 3            |
| GP Connect                                  |                              | 2            |                         |              |
| icare                                       |                              | 2            |                         |              |
| Care IS                                     |                              | 1            |                         |              |
| Rio                                         |                              | 1            |                         | 1            |
| Care and Health Information Exchange (CHIE) |                              | 1            |                         |              |
| e-healthscope                               |                              | 1            |                         |              |
| Lorenzo                                     |                              | 1            | 2                       |              |
| Cleric                                      |                              |              |                         | 2            |
| Don't know                                  |                              |              | 2                       |              |
