# Supplementary material for: Mapping and characterising electronic palliative care coordination systems and their intended impact: A national survey of end-of-life care commissioners
Source: PubMed Central journal article supplement (PMC9565729; doi:10.1371/journal.pone.0275991), 2022-10-14
Supplement: pone.0275991.s005.pdf [file pone.0275991.s005.pdf]

## Alignment of intended impact with measurement reported by survey respondents

### CCGs with operational EPaCCS

| CCG No. | Intended Impact                       | Alignment with measure |
|---------|---------------------------------------|------------------------|
| 2       | Care coordination                     | Not measured           |
| 3       | Care coordination                     | Not measured           |
| 5       | Care coordination                     | Low                    |
|         | Patient impact - Meet wishes          | Low                    |
|         | Patient impact - Better conversations | Low                    |
| 6       | Care coordination                     | High                   |
|         | Patient impact - Meet wishes          | High                   |
| 7       | Care coordination                     | High                   |
|         | Patient impact - Meet wishes          | High                   |
| 14      | Care coordination                     | Low                    |
|         | Patient impact - Meet wishes          | Low                    |
| 15      | Access to information                 | Low                    |
| 20      | Care coordination                     | Low                    |
|         | Access to information                 | Low                    |
| 22      | Patient impact - Meet wishes          | Low                    |
| 23      | Patient impact - Meet wishes          | Low                    |
| 24      | Patient impact - Meet wishes          | Low                    |
| 25      | Patient impact - Meet wishes          | Low                    |
| 26      | Patient impact - Meet wishes          | Low                    |
| 27      | Care coordination                     | Low                    |
| 28      | Access to information                 | High                   |
| 30      | Access to information                 | Not measured           |
|         | Care coordination                     | Not measured           |
|         | Patient impact - Better conversations | Not measured           |
|         | Patient impact - Meet wishes          | Not measured           |
|         | HP Practice                           | Not measured           |
| 32      | Patient impact - Better conversations | Low                    |
| 37      | Patient impact - Better conversations | Low                    |
| 39      | Patient impact - Meet wishes          | High                   |
| 40      | Patient impact - Better conversations | High                   |
|         | Access to information                 | Low                    |
| 43      | Care coordination                     | Not measured           |
| 44      | Care coordination                     | Not measured           |
| 46      | Patient impact - Better conversations | Low                    |
|         | Patient impact - Meet wishes          | Low                    |
| 47      | Patient impact - Better conversations | Low                    |
|         | Patient impact - Meet wishes          | Low                    |
| 48      | Access to information                 | Low                    |
|         | Patient impact - Meet wishes          | Low                    |
| 50      | Access to information                 | High                   |
|         | Patient impact - Better conversations | High                   |
|         | Patient impact - Meet wishes          | High                   |
| 51      | Access to information                 | High                   |
|         | Patient impact - Better conversations | High                   |
|         | Patient impact - Meet wishes          | High                   |
| 52      | Access to information                 | High                   |
|         | Patient impact - Better conversations | High                   |

| <b>CCG No.</b> | <b>Intended Impact</b>                | <b>Alignment with measure</b> |
|----------------|---------------------------------------|-------------------------------|
|                | Patient impact - Meet wishes          | High                          |
| 53             | Access to information                 | High                          |
|                | Patient impact - Better conversations | High                          |
|                | Patient impact - Meet wishes          | High                          |
| 54             | Access to information                 | Low                           |
| 55             | Access to information                 | Not measured                  |
| 57             | Care coordination                     | Low                           |
|                | Access to information                 | Low                           |
|                | Patient impact - Meet wishes          | Low                           |
| 58             | HP Practice                           | Low                           |
|                | Patient impact - Better conversations | Low                           |
|                | Care coordination                     | Low                           |
|                | Patient impact - Meet wishes          | Low                           |
| 59             | HP Practice                           | Low                           |
|                | Patient impact - Better conversations | Low                           |
|                | Care coordination                     | Low                           |
|                | Patient impact - Meet wishes          | Low                           |
| 61             | Patient impact - Meet wishes          | Low                           |
| 62             | Care coordination                     | High                          |
|                | Access to information                 | High                          |
|                | Patient impact - Meet wishes          | High                          |
|                | Patient impact - Better conversations | High                          |
|                | Family impacts                        | High                          |
| 63             | Care coordination                     | High                          |
|                | Access to information                 | High                          |
|                | Patient impact - Meet wishes          | High                          |
|                | Patient impact - Better conversations | High                          |
|                | Family impacts                        | High                          |
| 64             | Care coordination                     | High                          |
|                | Access to information                 | High                          |
|                | Patient impact - Meet wishes          | High                          |
|                | Patient impact - Better conversations | High                          |
|                | Family impacts                        | High                          |
| 65             | Care coordination                     | High                          |
|                | Access to information                 | High                          |
|                | Patient impact - Meet wishes          | High                          |
|                | Patient impact - Better conversations | High                          |
|                | Family impacts                        | High                          |
| 66             | Care coordination                     | High                          |
|                | Access to information                 | High                          |
|                | Patient impact - Meet wishes          | High                          |
|                | Family impacts                        | High                          |
|                | Patient impact - Better conversations | High                          |
| 67             | Care coordination                     | High                          |
|                | Access to information                 | High                          |
|                | Patient impact - Meet wishes          | High                          |
|                | Patient impact - Better conversations | High                          |
|                | Family impacts                        | High                          |
| 68             | Care coordination                     | High                          |
|                | Access to information                 | High                          |

| <b>CCG No.</b> | <b>Intended Impact</b>                | <b>Alignment with measure</b> |
|----------------|---------------------------------------|-------------------------------|
|                | Patient impact - Meet wishes          | High                          |
|                | Patient impact - Better conversations | High                          |
|                | Family impacts                        | High                          |
| 69             | Care coordination                     | High                          |
|                | Access to information                 | High                          |
|                | Patient impact - Meet wishes          | High                          |
|                | Patient impact - Better conversations | High                          |
|                | Family impacts                        | High                          |
| 70             | Access to information                 | Low                           |
|                | Patient impact - Meet wishes          | Low                           |
| 71             | Care coordination                     | Low                           |
|                | Patient impact - Meet wishes          | Low                           |
|                | Access to information                 | Low                           |
| 72             | Access to information                 | High                          |
| 73             | Access to information                 | Low                           |
|                | Patient impact - Meet wishes          | Low                           |
|                | Family impacts                        | Low                           |
| 75             | Family impacts                        | Low                           |
|                | Patient impact - Meet wishes          | Low                           |
| 76             | Patient impact - Meet wishes          | Low                           |
|                | Access to information                 | Low                           |
|                | Patient impact - Better conversations | Low                           |
| 77             | Care coordination                     | High                          |
|                | Patient impact - Meet wishes          | Low                           |
| 79             | Access to information                 | Low                           |
| 80             | Care coordination                     | Not measured                  |
| 81             | Access to information                 | High                          |
|                | Patient impact - Meet wishes          | Low                           |
| 82             | Care coordination                     | High                          |
|                | Patient impact - Meet wishes          | Low                           |
|                | Family impacts                        | Low                           |
| 83             | Care coordination                     | High                          |
|                | Patient impact - Meet wishes          | Low                           |
|                | Family impacts                        | Low                           |
| 84             | Care coordination                     | Low                           |
|                | Patient impact - Meet wishes          | Low                           |
| 85             | HP Practice                           | Not measured                  |
|                | Care coordination                     | Not measured                  |

### CCGs Planning an EPaCCS

| <b>CCG No.</b> | <b>Intended Impact</b>                | <b>Alignment with measure</b> |
|----------------|---------------------------------------|-------------------------------|
| 1              | Access to information                 | Not measured                  |
| 10             | Patient impact - Meet wishes          | High                          |
|                | Care coordination                     | High                          |
| 11             | Patient impact - Better conversations | High                          |
|                | Patient impact - Meet wishes          | High                          |
| 12             | Care coordination                     | Low                           |
| 13             | Care coordination                     | Low                           |

| <b>CCG No.</b> | <b>Intended Impact</b>                | <b>Alignment with measure</b> |
|----------------|---------------------------------------|-------------------------------|
| 19             | Patient impact - Meet wishes          | High                          |
|                | Care coordination                     | Low                           |
|                | Patient impact - Better conversations | High                          |
|                | Access to information                 | Low                           |
| 35             | Care coordination                     | Low                           |
|                | Patient impact - Meet wishes          | Low                           |
| 36             | Care coordination                     | Low                           |
|                | Patient impact - Meet wishes          | Low                           |
|                | Access to information                 | Low                           |
| 38             | Patient impact - Meet wishes          | High                          |
|                | Care coordination                     | High                          |
| 41             | Family impacts                        | Low                           |
|                | Patient impact - Meet wishes          | Low                           |
| 42             | Care coordination                     | Low                           |
|                | Patient impact - Meet wishes          | Low                           |
| 49             | Care coordination                     | Low                           |
|                | Patient impact - Meet wishes          | Low                           |
| 60             | No impact stated                      | not applicable                |
